# Supplementary material
Source: Springer Nature journal article supplement (https://www.springermedizin.de/resource/supplementary/12904_2014_237_MOESM2_ESM.pdf/9517850)

### EG: Music therapy

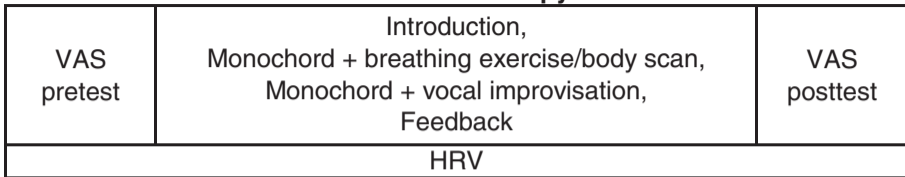

### CG: Verbal relaxation (MBSR)

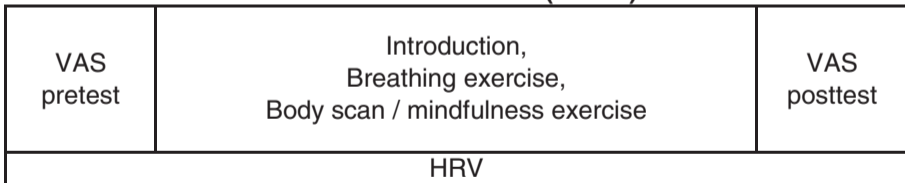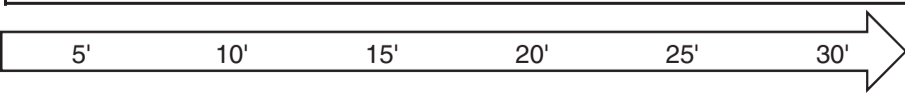

Supplement: MOESM2 [file 9517850]
